# Supplementary material
Source: ML conference proceedings conference paper supplement (https://openaccess.thecvf.com/content/CVPR2023/html/Gupta_Visual_Programming_Compositional_CVPR_2023_paper.html)
Supplement: Supplementary file 1 [file Gupta_Visual_Programming_Compositional_CVPR_2023_supplemental.zip]

# Visual Programming:

## Compositional visual reasoning without training

Qualitative Results

This deck shows numerous successful visual rationales generated by **VisProg** for the following tasks

- Compositional Visual QA (GQA)
- Reasoning with image pairs (NLVR)
- Factual Knowledge Object Tagging
- Image Editing with Natural Language

We end with failure cases which are mainly caused by

- Logically incorrect programs
- Incorrect prediction from a module

# GQA

- ✓ Answer compositional visual questions

# Compositional Question Answering

Are there both ties and glasses in the picture?

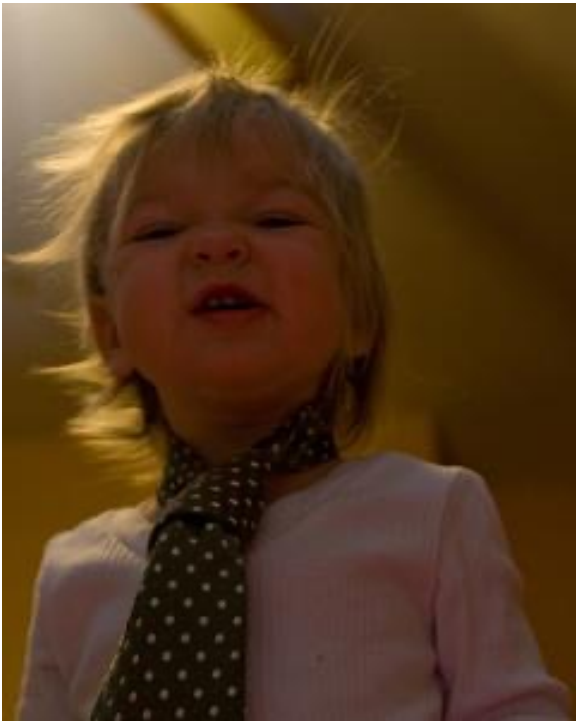

Prediction: no

|                                                                                      |                                                                                                                     |
|--------------------------------------------------------------------------------------|---------------------------------------------------------------------------------------------------------------------|
| 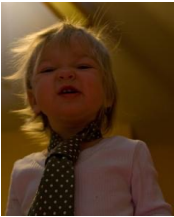  | IMAGE                                                                                                               |
| 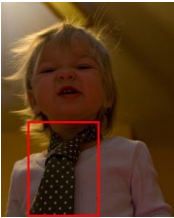  | BOX0=Loc(image=IMAGE, object='ties')                                                                                |
| 1                                                                                    | ANSWER0=Count(bbox=BOX0)                                                                                            |
| 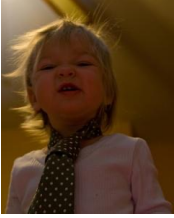 | BOX1=Loc(image=IMAGE, object='glasses')                                                                             |
| 0                                                                                    | ANSWER1=Count(bbox=BOX1)                                                                                            |
| no                                                                                   | ANSWER2=Eval(expr="'yes' if {ANSWER0}>0 and {ANSWER1}>0 else 'no'")<br>=Eval(expr="'yes' if 1>0 and 0>0 else 'no'") |

# Compositional Question Answering

Is the head band brown or blue?

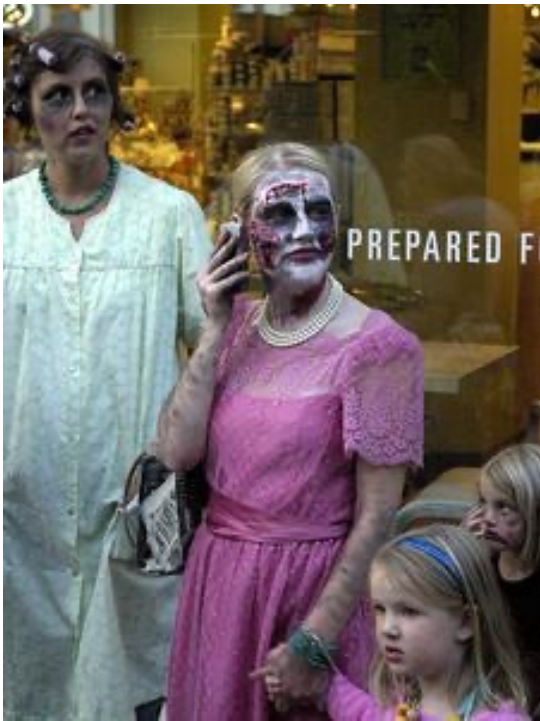

Prediction: blue

|                                                                                     |                                                                                                                                             |
|-------------------------------------------------------------------------------------|---------------------------------------------------------------------------------------------------------------------------------------------|
| 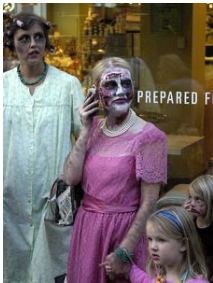 | <p>IMAGE</p>                                                                                                                                |
| 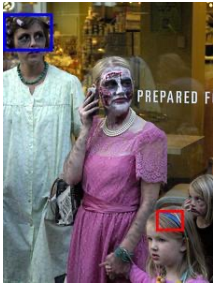 | <p>BOX0=Loc(image=IMAGE, object='head band')</p> <p>For GQA, we visualize the highest-ranking box in red. The remaining in blue.</p>        |
| 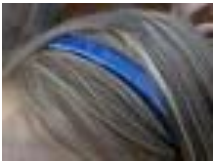 | <p>IMAGE0=Crop(bbox=BOX0)</p> <p>When more than 1 boxes are provided to Crop, only the first (i.e., the highest-ranking) box is cropped</p> |
| <p>blue</p>                                                                         | <p>ANSWER0=Vqa(image=IMAGE0, question='What color is the head band?')</p>                                                                   |

# Compositional Question Answering

Is there a helmet in the photo that is not blue?

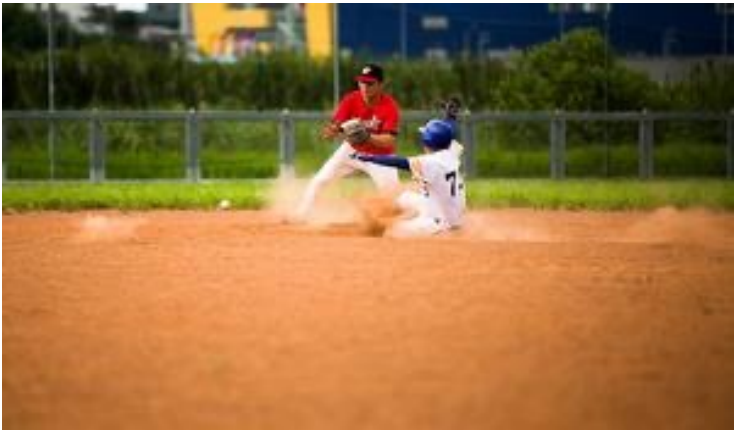

Prediction: no

|                                                                                     |                                                                                                                               |
|-------------------------------------------------------------------------------------|-------------------------------------------------------------------------------------------------------------------------------|
| 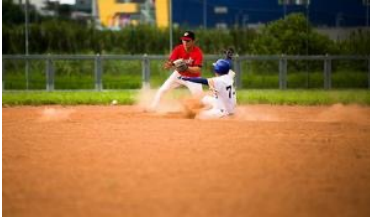 | <code>IMAGE</code>                                                                                                            |
| 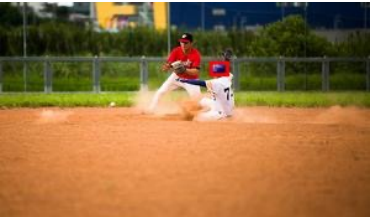 | <code>BOX0=Loc(image=IMAGE, object='helmet')</code>                                                                           |
| 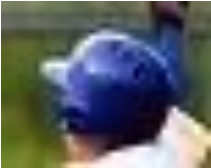 | <code>IMAGE0=Crop(bbox=BOX0)</code>                                                                                           |
| <code>blue</code>                                                                   | <code>ANSWER0=Vqa(image=IMAGE0, question='What color is the helmet?')</code>                                                  |
| <code>no</code>                                                                     | <code>ANSWER1=Eval(expr="'yes' if {ANSWER0} != 'blue' else 'no'")<br/>=Eval(expr="'yes' if 'blue' != 'blue' else 'no')</code> |

# Compositional Question Answering

Do the gloves and the pants have the same color?

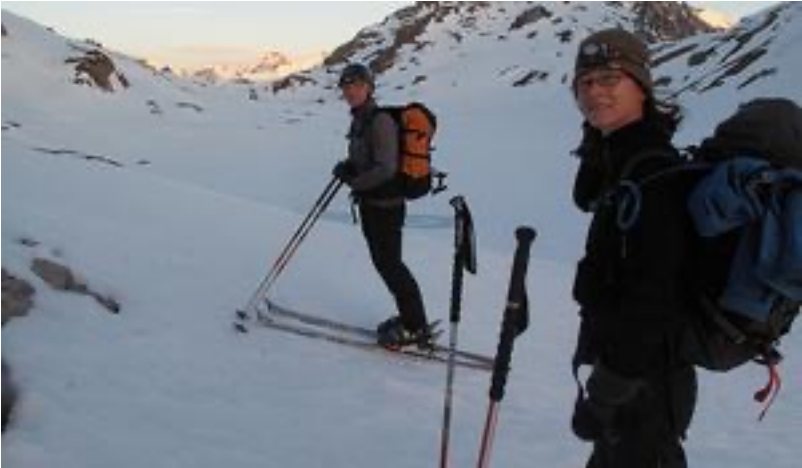

Prediction: no

|                                                                                      |                                                                                                                                 |
|--------------------------------------------------------------------------------------|---------------------------------------------------------------------------------------------------------------------------------|
| 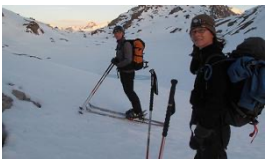   | <code>IMAGE</code>                                                                                                              |
| 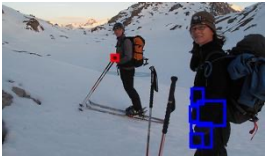  | <code>BOX0=Loc(image=IMAGE, object='gloves')</code>                                                                             |
| 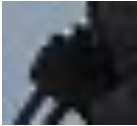  | <code>IMAGE0=Crop(bbox=BOX0)</code>                                                                                             |
| 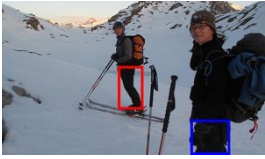  | <code>BOX1=Loc(image=IMAGE, object='pants')</code>                                                                              |
| 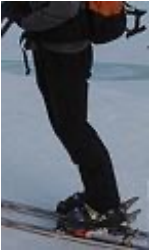 | <code>IMAGE1=Crop(bbox=BOX1)</code>                                                                                             |
| <code>black</code>                                                                   | <code>ANSWER0=Vqa(image=IMAGE0, question='What color are the gloves?')</code>                                                   |
| <code>black</code>                                                                   | <code>ANSWER1=Vqa(image=IMAGE1, question='What color are the pants?')</code>                                                    |
| <code>yes</code>                                                                     | <code>ANSWER2=Eval(expr="'yes' if {ANSWER0}=={ANSWER1} else 'no'")<br/>=Eval(expr="'yes' if 'black'=='black' else 'no'")</code> |

# Natural Language Visual Reasoning (NLVR)

- ✓ Verify statements about image pairs using a single-image VQA model

# NLVR

In one image, a blue and yellow bird is grasping onto a human hand with its talon.

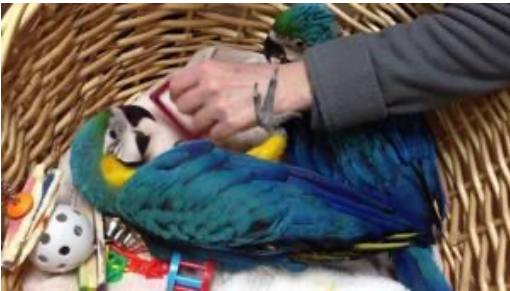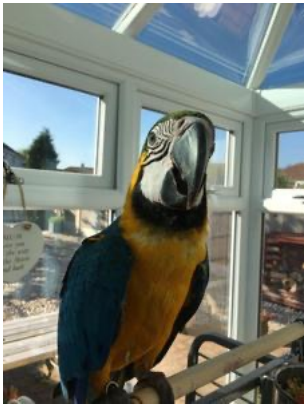

Prediction: True

|                                                                                    |                                                                                                           |
|------------------------------------------------------------------------------------|-----------------------------------------------------------------------------------------------------------|
| 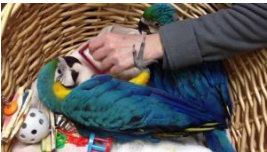  | LEFT                                                                                                      |
| 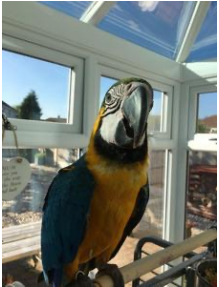 | RIGHT                                                                                                     |
| yes                                                                                | <code>ANSWER0=Vqa(image=LEFT, question='Is there a blue and yellow bird in the image?')</code>            |
| no                                                                                 | <code>ANSWER1=Vqa(image=RIGHT, question='Is there a blue and yellow bird in the image?')</code>           |
| yes                                                                                | <code>ANSWER2=Vqa(image=LEFT, question='Is the bird grasping onto a human hand with its talons?')</code>  |
| no                                                                                 | <code>ANSWER3=Vqa(image=RIGHT, question='Is the bird grasping onto a human hand with its talons?')</code> |
| True                                                                               | <code>ANSWER4=Eval(expr="ANSWER0 and ANSWER2")</code><br><code>=Eval(expr="True and True")</code>         |
| False                                                                              | <code>ANSWER5=Eval(expr="ANSWER1 and ANSWER3")</code><br><code>=Eval(expr="True and False")</code>        |
| True                                                                               | <code>ANSWER6=Eval(expr="ANSWER4 xor ANSWER5")</code><br><code>=Eval(expr="True != False")</code>         |

# NLVR

The left and right image contains a total of six people and two boats

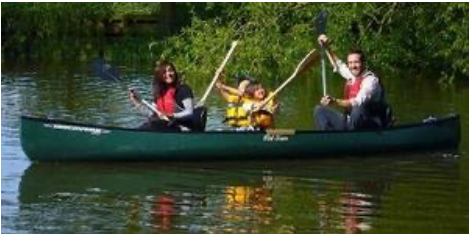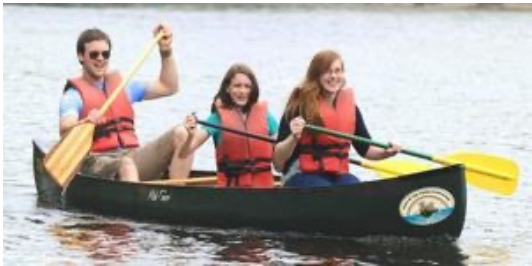

Prediction: False

|                                                                                    |                                                                                                                         |
|------------------------------------------------------------------------------------|-------------------------------------------------------------------------------------------------------------------------|
| 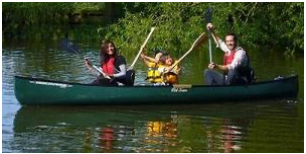 | LEFT                                                                                                                    |
| 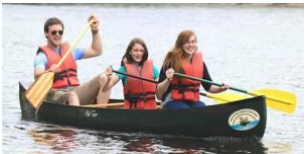 | RIGHT                                                                                                                   |
| 4                                                                                  | <code>ANSWER0=Vqa(image=LEFT, question='How many people are in the image?')</code>                                      |
| 3                                                                                  | <code>ANSWER1=Vqa(image=RIGHT, question='How many people are in the image?')</code>                                     |
| 1                                                                                  | <code>ANSWER2=Vqa(image=LEFT, question='How many boats are in the image?')</code>                                       |
| 1                                                                                  | <code>ANSWER3=Vqa(image=RIGHT, question='How many boats are in the image?')</code>                                      |
| False                                                                              | <code>ANSWER4=Eval(expr="ANSWER0+ANSWER1==6 and ANSWER2+ANSWER3==2")<br/>=Eval(expr="4 + 3 == 6 and 1 + 1 == 2")</code> |

# NLVR

There are more birds in the image on the right than in the image on the left.

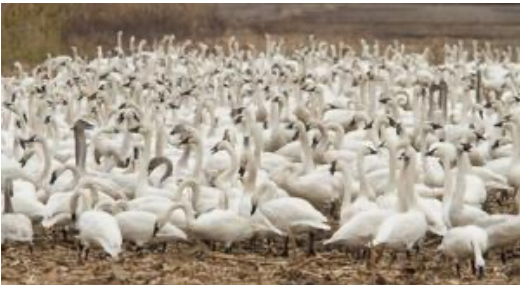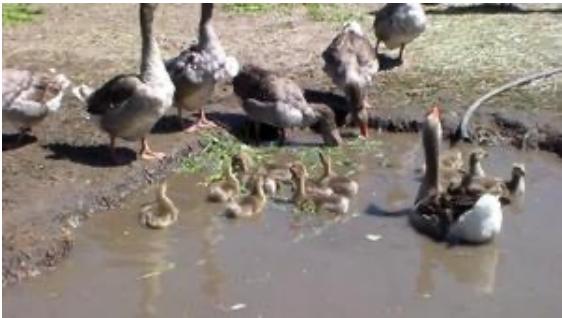

Prediction: False

|                                                                                    |                                                                                                     |
|------------------------------------------------------------------------------------|-----------------------------------------------------------------------------------------------------|
| 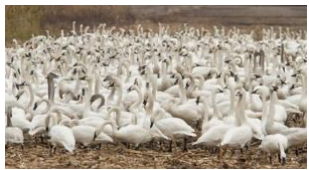 | LEFT                                                                                                |
| 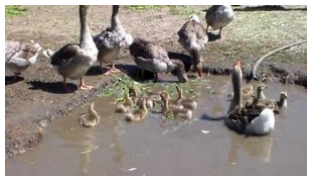 | RIGHT                                                                                               |
| 100                                                                                | <code>ANSWER0=Vqa(image=LEFT, question='How many birds are in the image?')</code>                   |
| 6                                                                                  | <code>ANSWER1=Vqa(image=RIGHT, question='How many birds are in the image?')</code>                  |
| False                                                                              | <code>ANSWER4=Eval(expr="{ANSWER0} &lt; {ANSWER1}")</code><br><code>=Eval(expr="100 &lt; 6")</code> |

# NLVR

A white and brown dog is standing in fallen leaves.

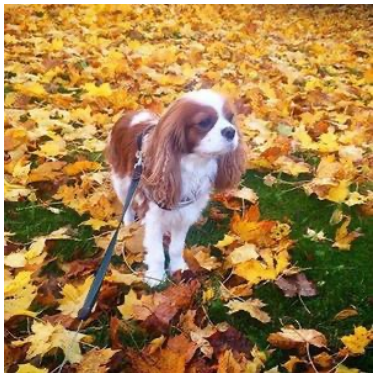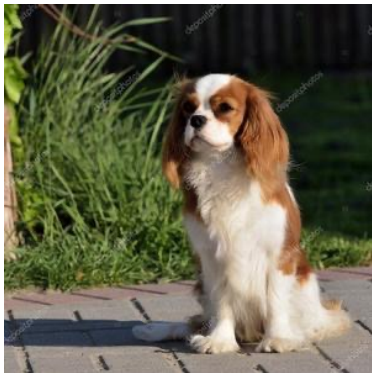

Prediction: True

|                                                                                    |                                                                                         |
|------------------------------------------------------------------------------------|-----------------------------------------------------------------------------------------|
| 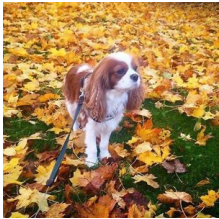  | LEFT                                                                                    |
| 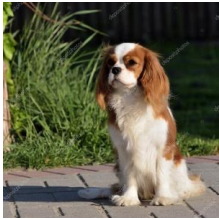 | RIGHT                                                                                   |
| yes                                                                                | <code>ANSWER0=Vqa(image=LEFT, question='Is the dog white and brown?')</code>            |
| no                                                                                 | <code>ANSWER1=Vqa(image=RIGHT, question='Is the dog white and brown?')</code>           |
| yes                                                                                | <code>ANSWER2=Vqa(image=LEFT, question='Is the dog standing in fallen leaves?')</code>  |
| no                                                                                 | <code>ANSWER3=Vqa(image=RIGHT, question='Is the dog standing in fallen leaves?')</code> |
| True                                                                               | <code>ANSWER4=Eval(expr="ANSWER0 and ANSWER2")<br/>=Eval(expr="True and True")</code>   |
| False                                                                              | <code>ANSWER5=Eval(expr="ANSWER1 and ANSWER3")<br/>=Eval(expr="True and False")</code>  |
| True                                                                               | <code>ANSWER6=Eval(expr="ANSWER4 xor ANSWER5")<br/>=Eval(expr="True != False")</code>   |

# Factual Knowledge Object Tagging

- ✓ Tag Personalities
- ✓ Tag Brands & Logos
- ✓ Tag Objects

# Tag Personalities

Tag these prime ministers of North American and Asian countries

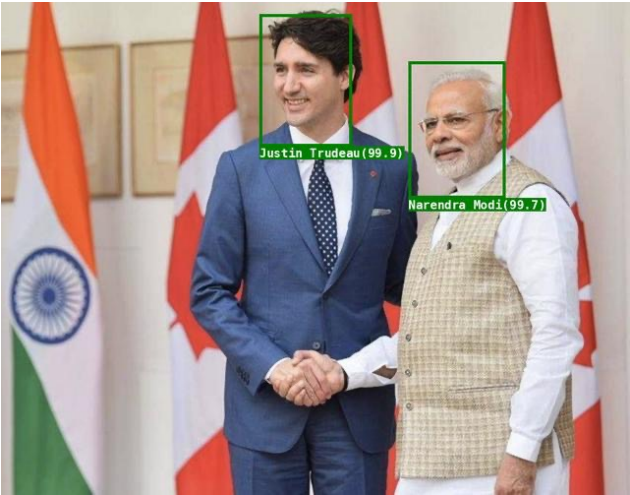

|                                                                                                                                                                                                                                                                                                                                                 |                                                                                                       |
|-------------------------------------------------------------------------------------------------------------------------------------------------------------------------------------------------------------------------------------------------------------------------------------------------------------------------------------------------|-------------------------------------------------------------------------------------------------------|
| 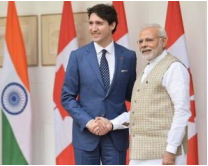                                                                                                                                                                                                                                                             | <code>IMAGE</code>                                                                                    |
| 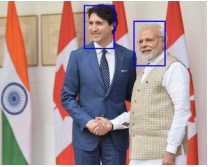                                                                                                                                                                                                                                                             | <code>OBJ0=FaceDet(image=IMAGE)</code>                                                                |
| <pre>[ 'Justin Trudeau', 'Shinzo Abe', 'Narendra Modi', 'Malcolm Turnbull', 'Bill English', 'Nguyen Xuan Phuc', 'Hun Sen', 'Jacinda Ardern', 'Moon Jae-in', 'Tsai Ing-wen', 'Rodrigo Duterte', 'Sheikh Hasina', 'Mahathir Mohamad', 'Prayut Chan-o-cha', 'Joko Widodo', 'Khaleda Zia', 'Giorgi Kvirikashvili', 'Najib Razak', 'Hun Sen' ]</pre> | <pre>LIST0=List(     query='prime ministers of North American and Asian countries',     max=20)</pre> |
| <pre>[ {'box': [544, 79, 673, 261], 'tag': 'Narendra Modi', 'score': 99.7},   {'box': [345, 16, 468, 192], 'tag': 'Justin Trudeau', 'score': 99.9} ]</pre>                                                                                                                                                                                      | <pre>OBJ1=Classify(image=IMAGE, categories=LIST0)</pre>                                               |
| 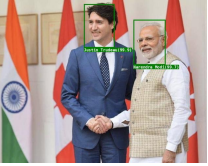                                                                                                                                                                                                                                                           | <code>IMAGE0=Tag(image=IMAGE, objects=OBJ1)</code>                                                    |

# Tag Personalities

Tag these 4 Triwizard Tournament champions

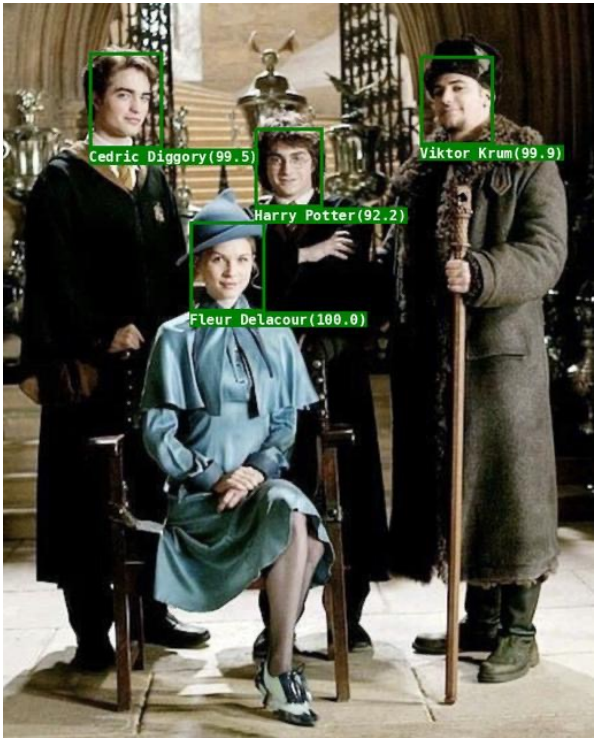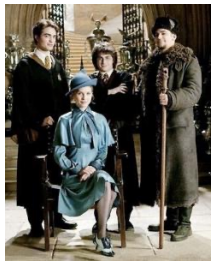

IMAGE

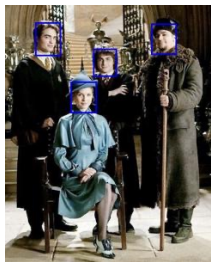

OBJ0=FaceDet(image=IMAGE)

['Harry Potter', 'Cedric Diggory', 'Fleur Delacour', 'Viktor Krum']

LIST0=List(  
 query='Triwizard Tournament champions',  
 max=4)

[{'box': [213, 249, 299, 352], 'tag': 'Fleur Delacour', 'score': 100.0}, {'box': [98, 56, 182, 166], 'tag': 'Cedric Diggory', 'score': 99.5}, {'box': [476, 60, 560, 162], 'tag': 'Viktor Krum', 'score': 99.9}, {'box': [287, 142, 365, 233], 'tag': 'Harry Potter', 'score': 92.2}]

OBJ1=Classify(  
 image=IMAGE,  
 categories=LIST0)

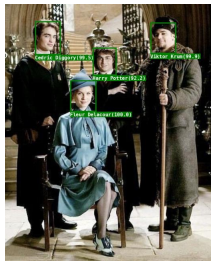

IMAGE0=Tag(image=IMAGE, objects=OBJ1)

# Tag Brands

Tag these laptops by popular laptop companies in the US

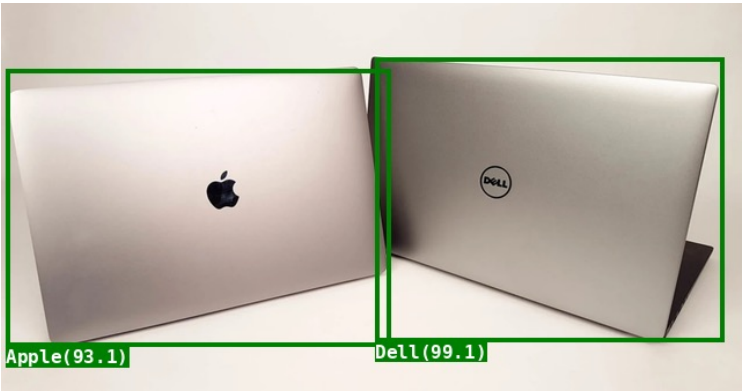

|                                                                                                                                                                                                |                                                                                        |
|------------------------------------------------------------------------------------------------------------------------------------------------------------------------------------------------|----------------------------------------------------------------------------------------|
| 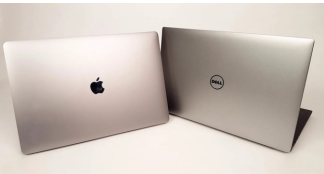                                                                                                            | <code>IMAGE</code>                                                                     |
| 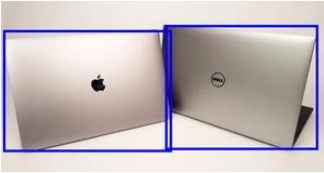                                                                                                            | <code>OBJ0=Loc(image=IMAGE, object='laptop')</code>                                    |
| <pre>[ 'Apple', 'Microsoft', 'Dell', 'Lenovo',<br/>  'Asus', 'Acer', 'HP', 'Samsung', 'Sony',<br/>    'Toshiba', 'LG', 'MSI', 'Razer',<br/>  'Alienware', 'Google', 'Huawei', 'Xiaomi' ]</pre> | <code>LIST0=List(<br/>    query='windows laptop manufacturers',<br/>    max=20)</code> |
| <pre>[ {'box': [4, 57, 336, 297], 'tag': 'Apple',<br/>  'score': 93.1},<br/>  {'box': [323, 47, 624, 293],<br/>    'tag': 'Dell', 'score': 99.1} ]</pre>                                       | <code>OBJ1=Classify(<br/>    image=IMAGE,<br/>    categories=LIST0)</code>             |
| 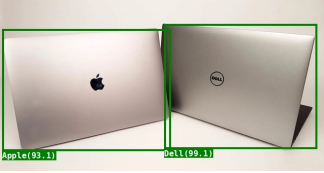                                                                                                           | <code>IMAGE0=Tag(image=IMAGE, objects=OBJ1)</code>                                     |

# Tag Brands

Tag the car logos of these top 5 German car companies

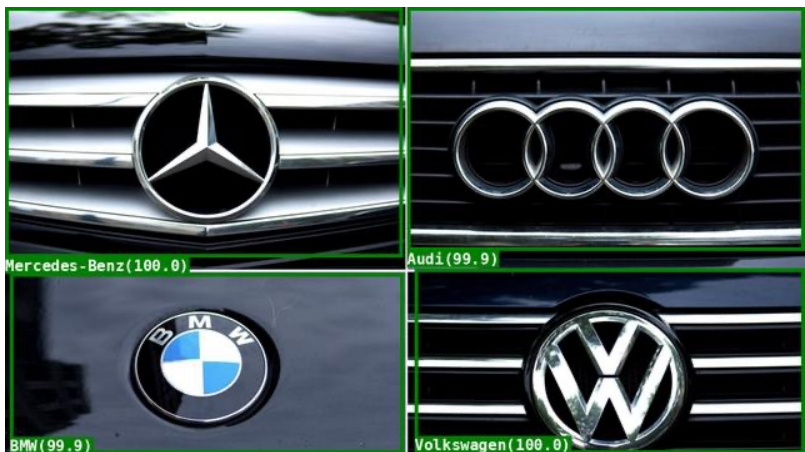

|                                                                                                                                                                                                                                                                                                             |                                                              |
|-------------------------------------------------------------------------------------------------------------------------------------------------------------------------------------------------------------------------------------------------------------------------------------------------------------|--------------------------------------------------------------|
| 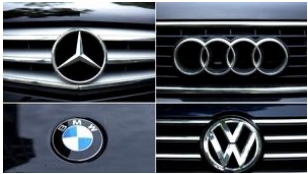                                                                                                                                                                                                                         | IMAGE                                                        |
| 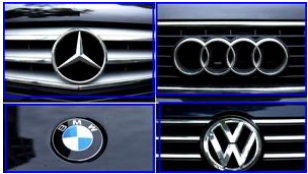                                                                                                                                                                                                                         | OBJ0=Loc(image=IMAGE, object='car logo')                     |
| <pre>[ 'BMW', 'Mercedes-Benz', 'Audi',<br/>  'Porsche', 'Volkswagen' ]</pre>                                                                                                                                                                                                                                | LIST0=List(<br>query='top 5 German car companies',<br>max=5) |
| <pre>[{'box': [5, 279, 418, 468], 'tag':<br/>  'BMW', 'score': 99.9}, {'box': [0, 0,<br/>  417, 262], 'tag': 'Mercedes-Benz',<br/>  'score': 100.0}, {'box': [430, 274,<br/>  839, 468], 'tag': 'Volkswagen',<br/>  'score': 100.0}, {'box': [422, 0, 839,<br/>  255], 'tag': 'Audi', 'score': 99.9}]</pre> | OBJ1=Classify(image=IMAGE, categories=LIST0)                 |
| 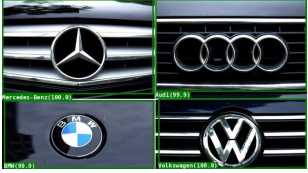                                                                                                                                                                                                                        | IMAGE0=Tag(image=IMAGE, objects=OBJ1)                        |

# Tag Objects

Tag the spherical balls with popular ball-based sports

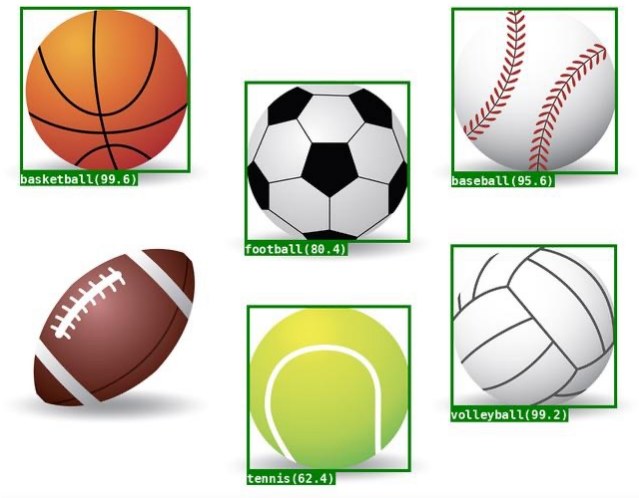

|                                                                                                                                                                                                                                                                                                                                                                                             |                                                                                 |
|---------------------------------------------------------------------------------------------------------------------------------------------------------------------------------------------------------------------------------------------------------------------------------------------------------------------------------------------------------------------------------------------|---------------------------------------------------------------------------------|
|                                                                                                                                                                                                                                                                                                                                                                                             | <code>IMAGE</code>                                                              |
|                                                                                                                                                                                                                                                                                                                                                                                             | <code>OBJ0=Loc(<br/>  image=IMAGE,<br/>  object='spherical ball')</code>        |
| <code>['baseball', 'basketball', 'football',<br/>  'golf', 'hockey', 'lacrosse', 'rugby',<br/>  'softball', 'volleyball', 'water polo',<br/>  'handball', 'jai alai', 'racquetball',<br/>  'squash', 'table tennis', 'tennis',<br/>  'ultimate frisbee', 'cricket', 'croquet']</code>                                                                                                       | <code>LIST0=List(<br/>  query='popular ball-based sports',<br/>  max=20)</code> |
| <code>[{'box': [25, 43, 248, 261], 'tag':<br/>  'basketball', 'score': 99.6}, {'box': [592,<br/>  44, 810, 263], 'tag': 'baseball', 'score':<br/>  95.6}, {'box': [323, 436, 538, 655], 'tag':<br/>  'tennis', 'score': 62.4}, {'box': [320,<br/>  141, 537, 353], 'tag': 'football', 'score':<br/>  80.4}, {'box': [591, 356, 809, 571], 'tag':<br/>  'volleyball', 'score': 99.2}]</code> | <code>OBJ1=Classify(image=IMAGE, categories=LIST0)</code>                       |
|                                                                                                                                                                                                                                                                                                                                                                                             | <code>IMAGE0=Tag(image=IMAGE, objects=OBJ1)</code>                              |

# Tag the same image in different ways

Tag these famous paintings

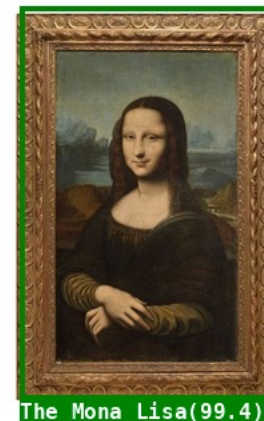

The Mona Lisa(99.4)

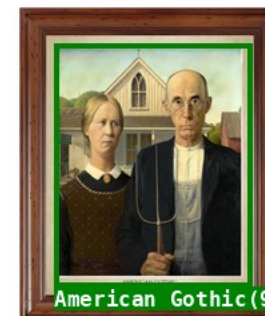

American Gothic(99.7)

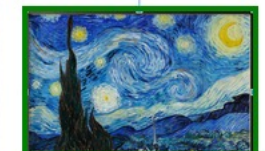

The Starry Night(99.4)

Tag these paintings with famous painters

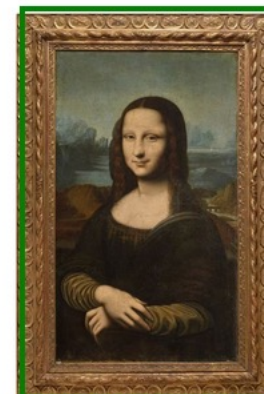

Leonardo da Vinci(99.4)

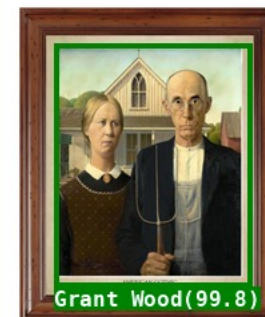

Grant Wood(99.8)

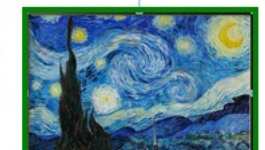

Vincent van Gogh(94.4)

Tag 'The Mona Lisa' with the year Mona Lisa was painted

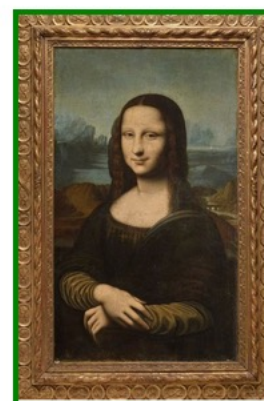

1503(1.0)

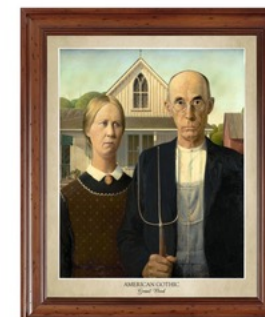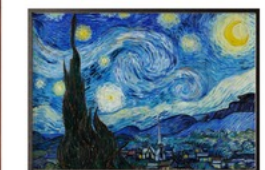

# Tag the same image in different ways

Tag the characters from popular TV series The Office

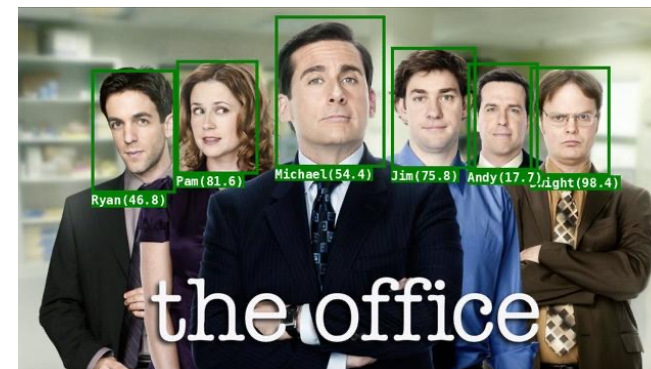

Tag the owner of Schrute Farms from popular TV series The Office

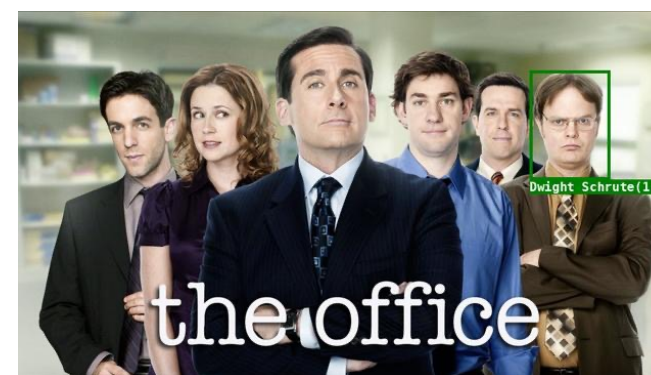

Tag the wife of Jim Halpert in popular TV series The Office

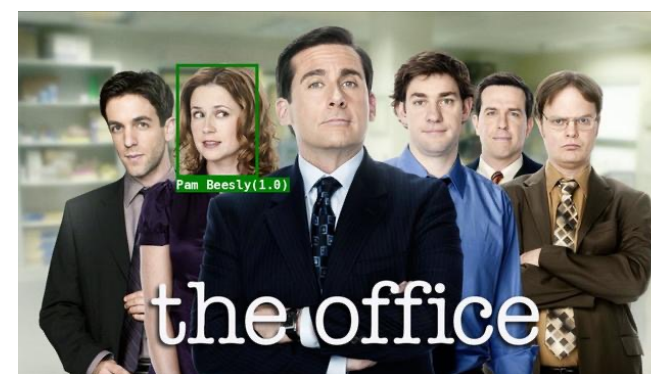

# Image Editing with Natural Language

- ✓ Person De-identification
- ✓ Stylistic Object Highlighting
- ✓ Face & Object Replacement

# Person De-identification

Hide Chandler and Joey with :ps

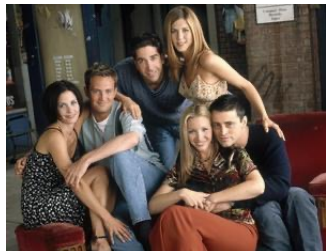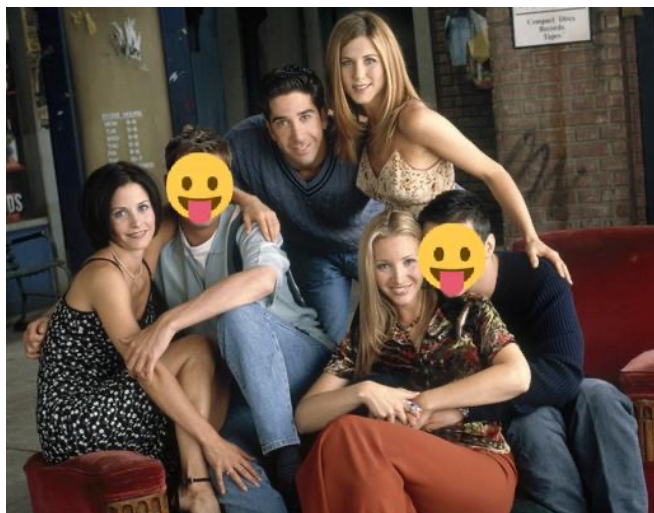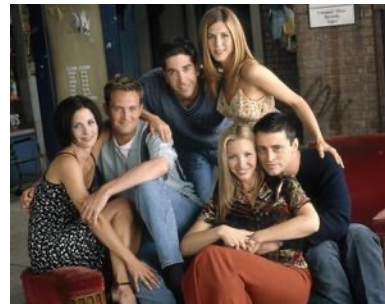

IMAGE

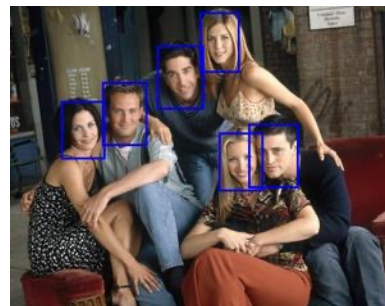

```
OBJ0=FaceDet(image=IMAGE)
```

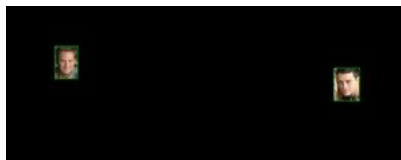

```
OBJ1=Select(  
    image=IMAGE, object=OBJ0,  
    query=['Chandler', 'Joey'],  
    category=None)
```

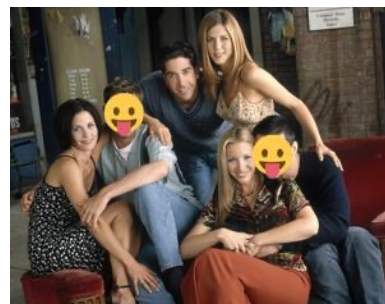

```
IMAGE0=Emoji(  
    image=IMAGE, object=OBJ1,  
    emoji='face_with_tongue')
```

# Person De-identification

Hide Daniel Craig with 8), Sean Connery with ;), and Pierce Brosnan with :p

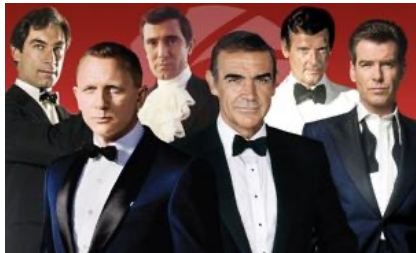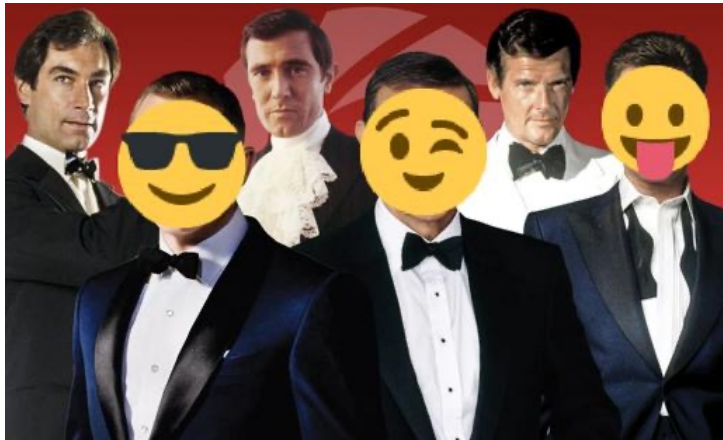

|  |                                                                                                              |
|--|--------------------------------------------------------------------------------------------------------------|
|  | <code>IMAGE</code>                                                                                           |
|  | <code>OBJ0=FaceDet(image=IMAGE)</code>                                                                       |
|  | <code>OBJ1=Select(<br/>  image=IMAGE, object=OBJ0,<br/>  query=['Daniel Craig'],<br/>  category=None)</code> |
|  | <code>IMAGE0=Emoji(<br/>  image=IMAGE, object=OBJ1,<br/>  emoji='smiling_face_with_sunglasses')</code>       |
|  | <code>OBJ2=Select(<br/>  image=IMAGE, object=OBJ0,<br/>  query=['Sean Connery'],<br/>  category=None)</code> |
|  | <code>IMAGE1=Emoji(<br/>  image=IMAGE0, object=OBJ2,<br/>  emoji='winking_face')</code>                      |
|  | Steps for 'Pierce Brosnan' are similar to previous steps and not shown for brevity                           |

# Stylistic Object Highlighting

Create a color pop of Melania Trump  
(person) and Michelle Obama  
(person) and blur the background

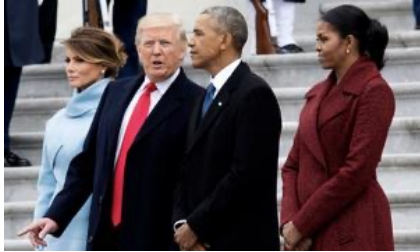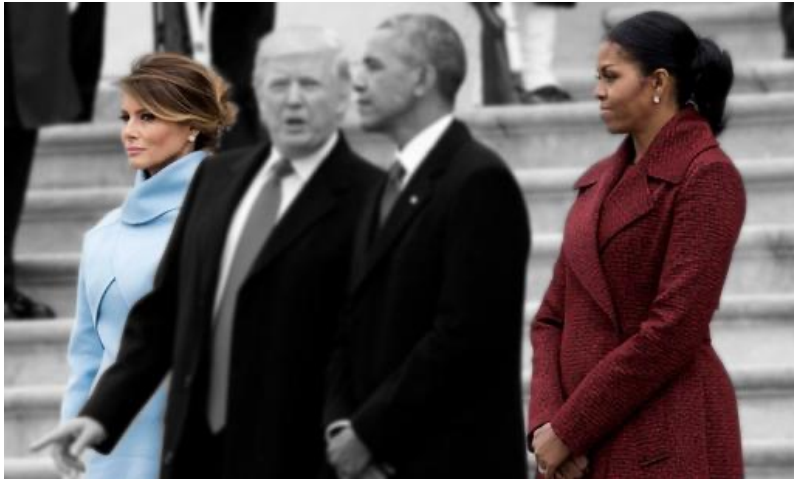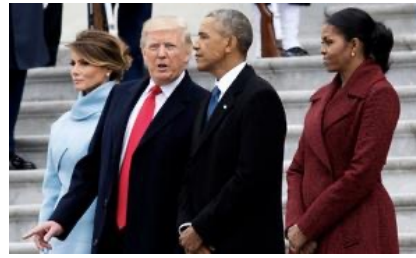

IMAGE

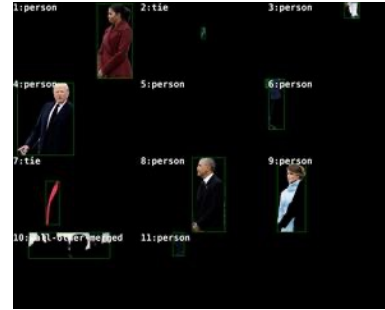

OBJ0=Seg(image=IMAGE)

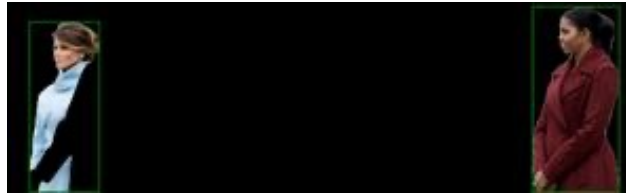

OBJ1=Select(  
image=IMAGE, object=OBJ0,  
query=['Melania Trump', 'Michelle Obama'],  
category='person')

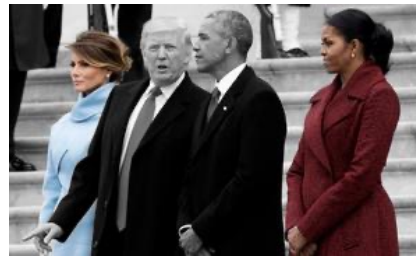

IMAGE0=ColorPop(image=IMAGE, object=OBJ1)

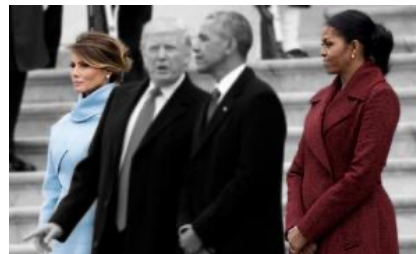

IMAGE1=BgBlur(image=IMAGE0, object=OBJ1)

# Stylistic Object Highlighting

Create a color pop of blue, yellow, green chairs (chair)

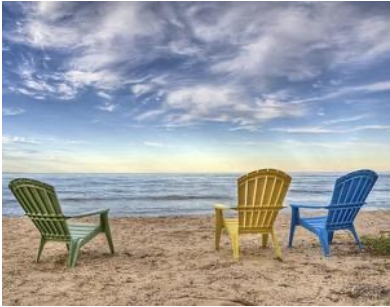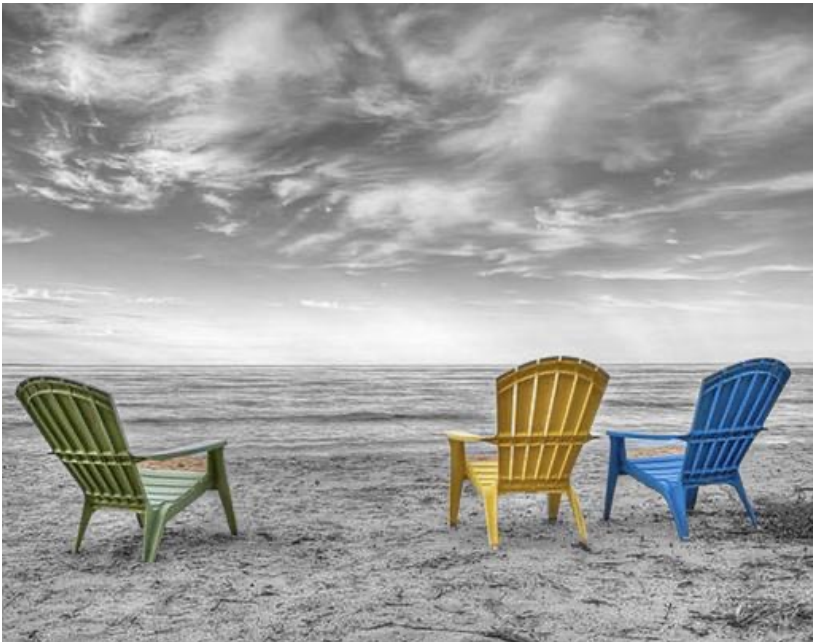

|                                                                                       |                                                                                                                                                                       |
|---------------------------------------------------------------------------------------|-----------------------------------------------------------------------------------------------------------------------------------------------------------------------|
| 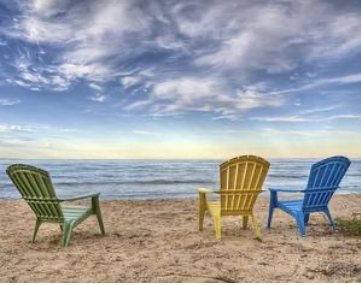   | <b>IMAGE</b>                                                                                                                                                          |
| 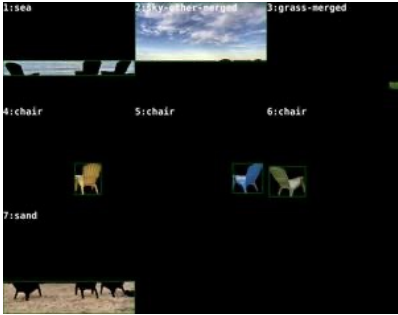   | <b>OBJ0</b> =Seg( <b>image</b> = <b>IMAGE</b> )                                                                                                                       |
| 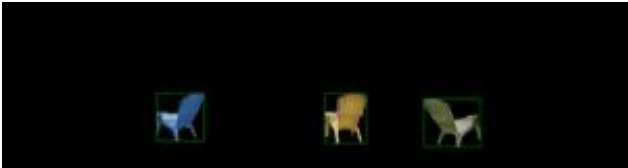   | <b>OBJ1</b> =Select(<br><b>image</b> = <b>IMAGE</b> , <b>object</b> = <b>OBJ0</b> ,<br><b>query</b> =[‘blue’, ‘yellow’, ‘green chairs’],<br><b>category</b> =‘chair’) |
| 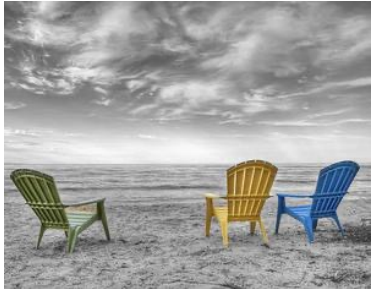 | <b>IMAGE0</b> =ColorPop( <b>image</b> = <b>IMAGE</b> , <b>object</b> = <b>OBJ1</b> )                                                                                  |

# Person Replacement

Replace Ajay Devgan with Tom Cruise

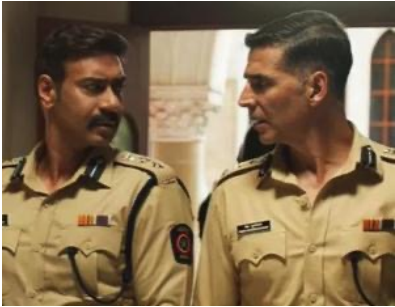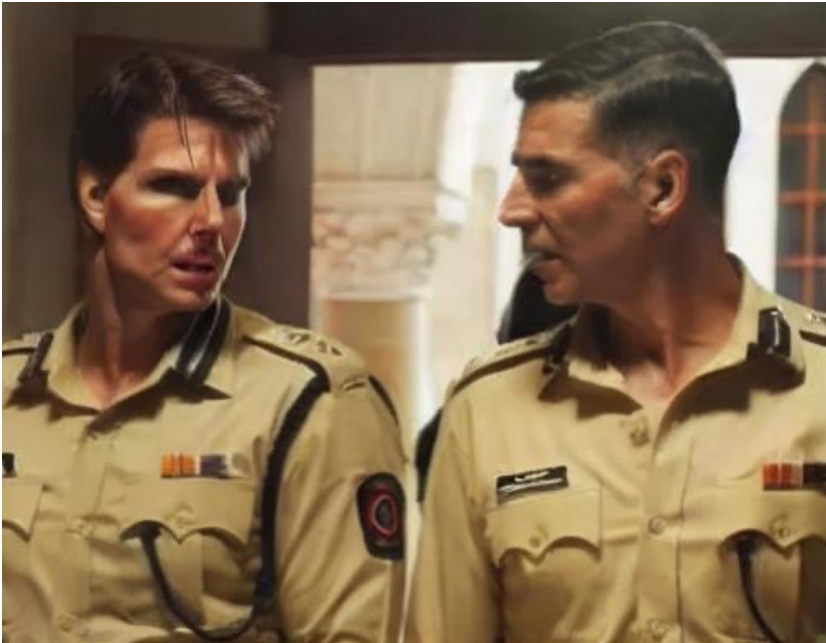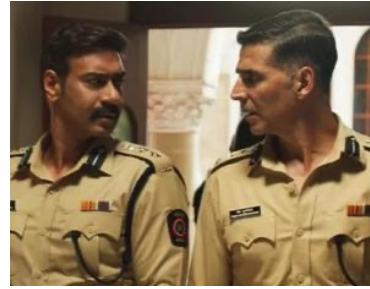

IMAGE

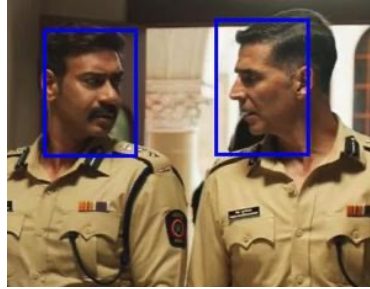

```
OBJ0=FaceDet(image=IMAGE)
```

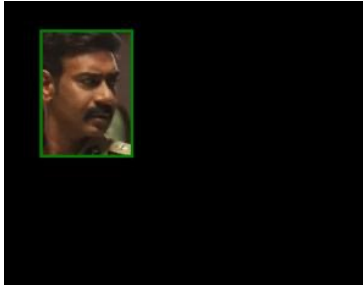

```
OBJ1=Select(  
    image=IMAGE, object=OBJ0,  
    query=['Ajay Devgan'],  
    category=None)
```

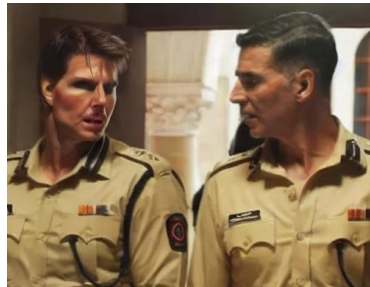

```
IMAGE0=Replace(  
    image=IMAGE,  
    object=OBJ1,  
    prompt='Tom Cruise')
```

# Object Replacement

Replace the desert by sandy beach

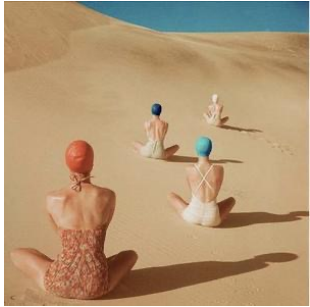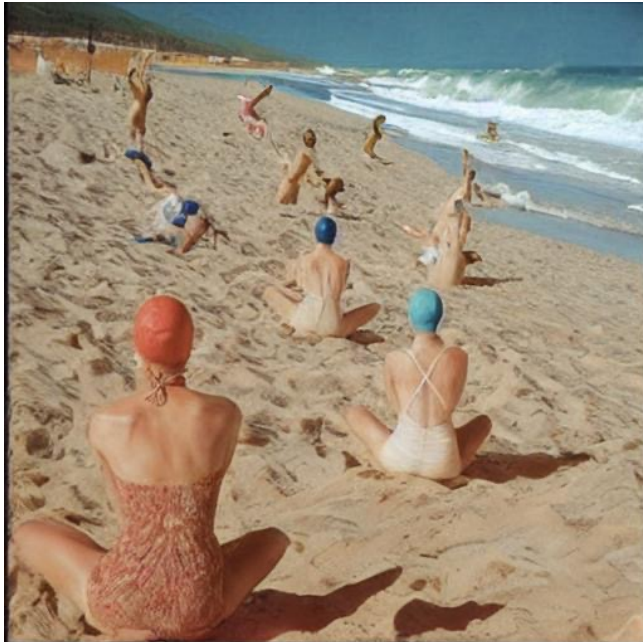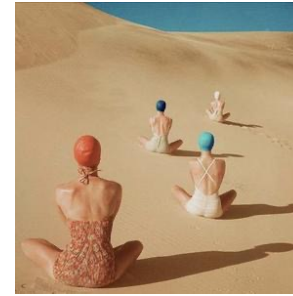

IMAGE

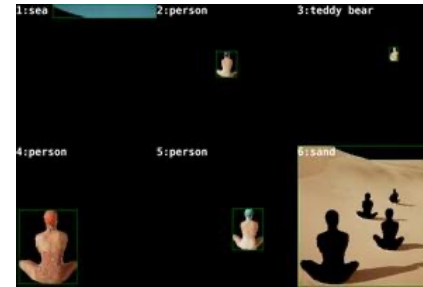

**OBJ0**=Seg(image=IMAGE)

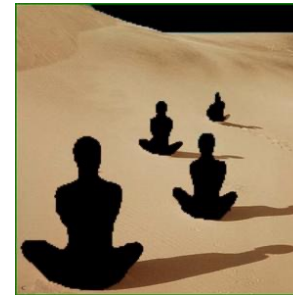

**OBJ1**=Select(  
    image=IMAGE, object=OBJ0,  
    query=['desert'],  
    category=None)

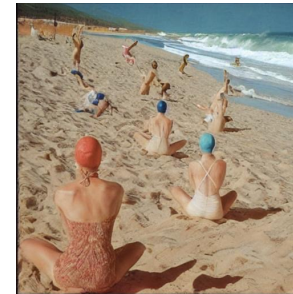

**IMAGE0**=Replace(  
    image=IMAGE,  
    object=OBJ1,  
    prompt='sandy beach')

# Edit the same image in different ways

Replace the rug with a black and white patterned carpet

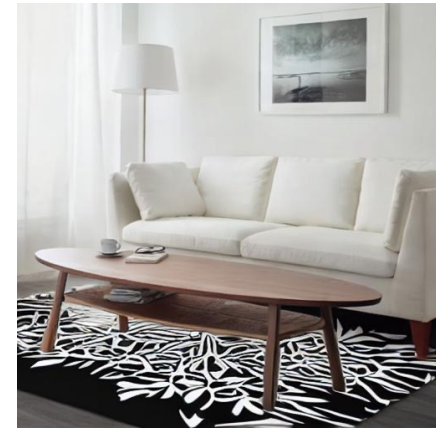

Replace the coffee table (table-merged) with a glass-top modern coffee table

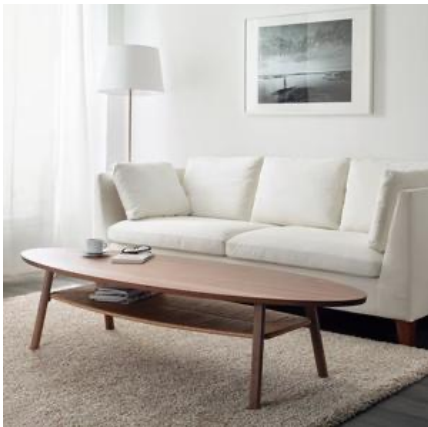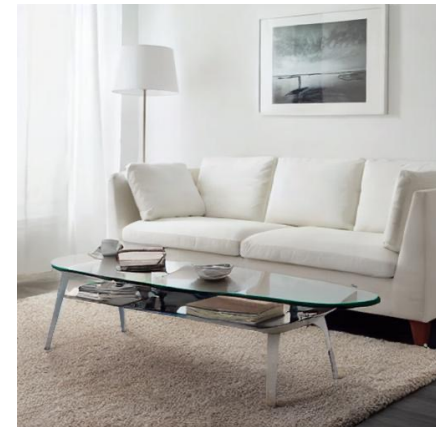

Replace the wall with a star wars poster hanging on the wall

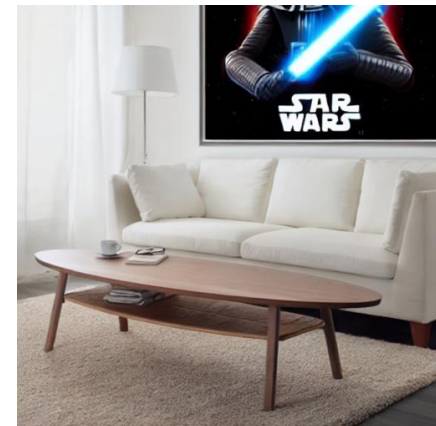

# Edit the same image in different ways

Replace the sky with sunrise behind mountains

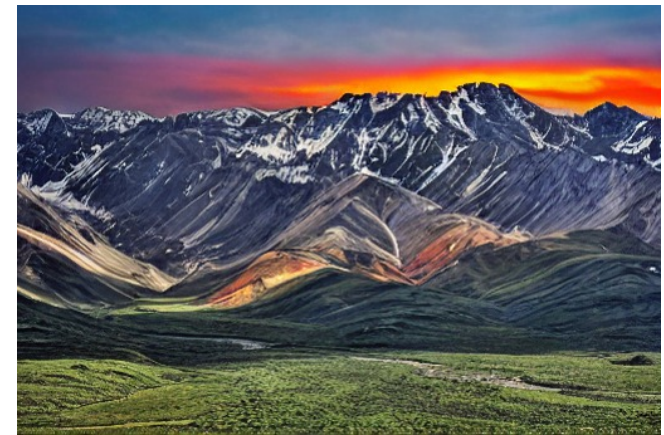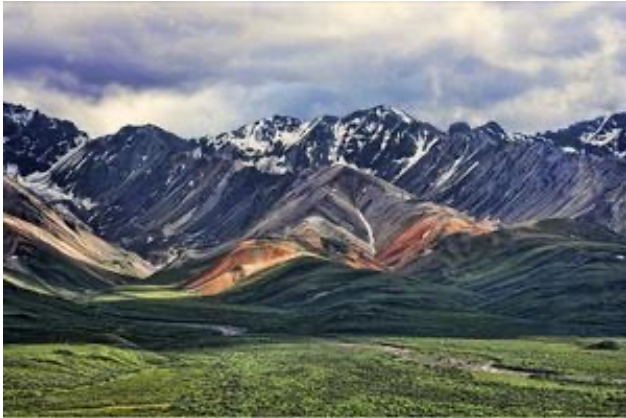

Replace the grass with clear blue lake

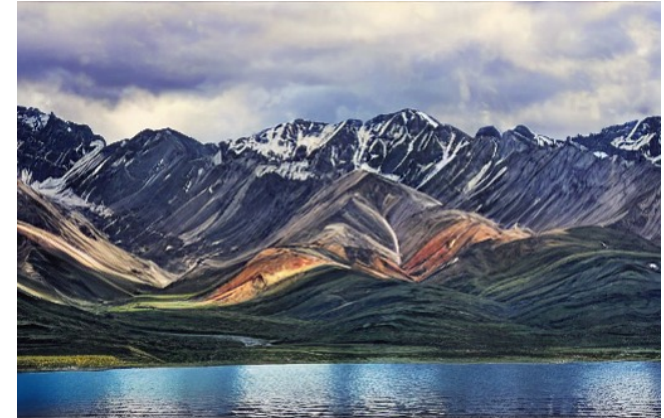

Replace the rocky mountain (mountain-merged)  
with snowy mountain

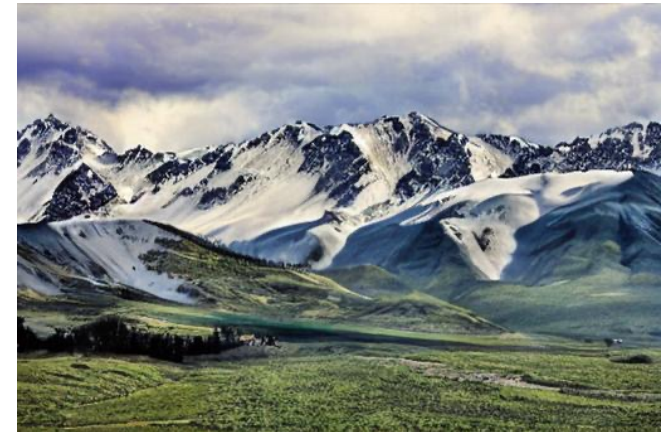

# Failure Cases

- Logically incorrect program
- Incorrect prediction from a module

# Incorrect Programs

What is the piece of furniture that is made of same material as the shelf the book is on called?

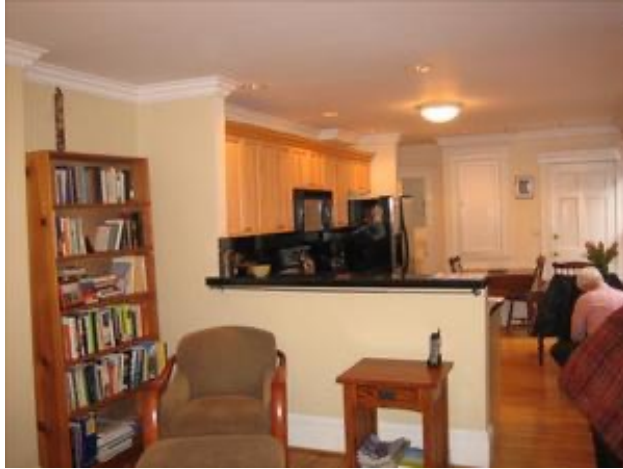

```
BOX0=Loc(image=IMAGE, object='shelf')
IMAGE0=Crop(image=IMAGE, bbox=BOX0)
BOX1=Loc(image=IMAGE, object='book')
IMAGES=CropBelow(image=IMAGE0, bbox=BOX)
ANSWER0=Vqa(
    image=IMAGE1,
    question='What is the piece of furniture that is made
    of same material as the shelf the book is on called?')
RESULT=ANSWER0
```

# Incorrect program - the correct program should first identify the material of the shelf and then ask for the furniture that is made of that material. The GQA prompts did not contain such examples where a VQA question is created using the output of previous steps.

Is there a cow or a horse that is not white?

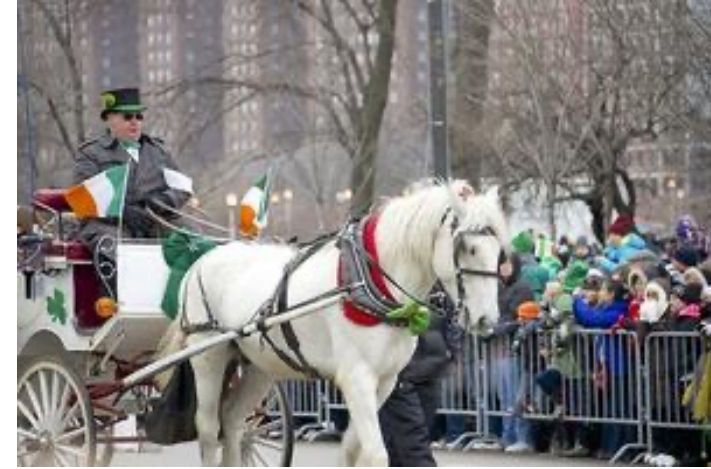

```
BOX0=Loc(image=IMAGE, object='cow')
BOX1=Loc(image=IMAGE, object='horse')
ANSWER0=Count(bbox=BOX0)
ANSWER1=Count(bbox=BOX1)
ANSWER1=Eval("'yes' if {ANSWER0}+{ANSWER1}>0 else 'no'")
RESULT=ANSWER1
```

# The program does not check if the cow or horse is white

# Incorrect Programs

Create a color pop of Melania Trump and Michelle Obama and blur the background

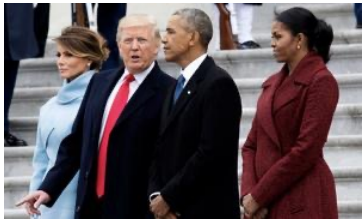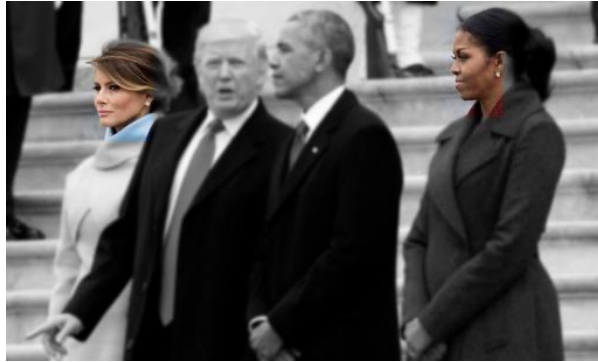

```
OBJ0=FaceDet(image=IMAGE)
OBJ1=Select(image=IMAGE, object=OBJ0,
            query=['Melania Trump', 'Michelle Obama'],
            category=None)
IMAGE0=ColorPop(image=IMAGE, object=OBJ1)
IMAGE1=BgBlur(image=IMAGE0, object=OBJ1)
RESULT=IMAGE1
```

# Generated program uses FaceDet instead of Seg, resulting in a color pop of only the faces instead of whole body

Tag the Jonas brother who married the Indian actress Priyanka Chopra

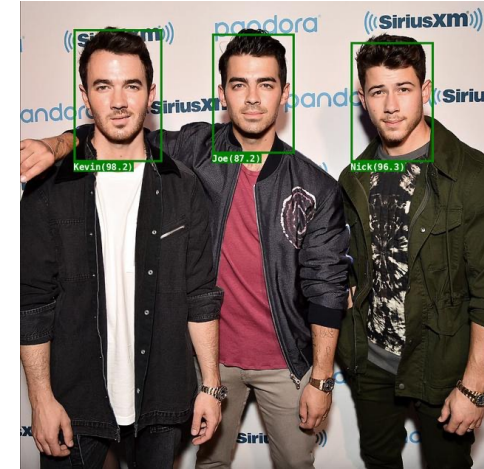

```
OBJ0=FaceDet(image=IMAGE)
LIST0=List(query='Jonas Brothers', max=3)
OBJ1=Classify(image=IMAGE, object=LIST0)
IMAGE0=Tag(image=IMAGE, object=OBJ1)
RESULT=IMAGE0
```

# The query to List should be 'Jonas Brother who married the Indian actress Priyanka Chopra' and max=1

# Module Failure

Is there a green stop sign or traffic light?

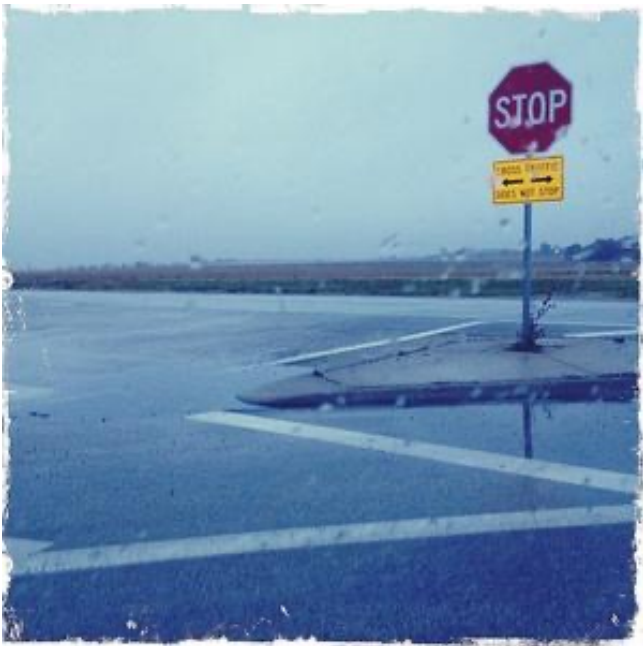

Prediction: yes  
Label: no

|     |                                                                                                                                                      |
|-----|------------------------------------------------------------------------------------------------------------------------------------------------------|
|     | IMAGE                                                                                                                                                |
|     | <pre>BOX0=Loc(image=IMAGE, object='green stop sign')<br/><br/># 2 boxes where predicted while there should be none</pre>                             |
| 2   | <pre>ANSWER0=Count(bbox=BOX0)</pre>                                                                                                                  |
|     | <pre>BOX1=Loc(image=IMAGE, object='green traffic light')</pre>                                                                                       |
| 0   | <pre>ANSWER1=Count(bbox=BOX1)</pre>                                                                                                                  |
| yes | <pre>ANSWER2=Eval(expr="'yes' if {ANSWER0}&gt;0 or {ANSWER1}&gt;0 else 'no'")<br/>          =Eval(expr="'yes' if 2&gt;0 and 0&gt;0 else 'no'")</pre> |

# Module Failure

Is the chair to the right of the plate made out of wicker?

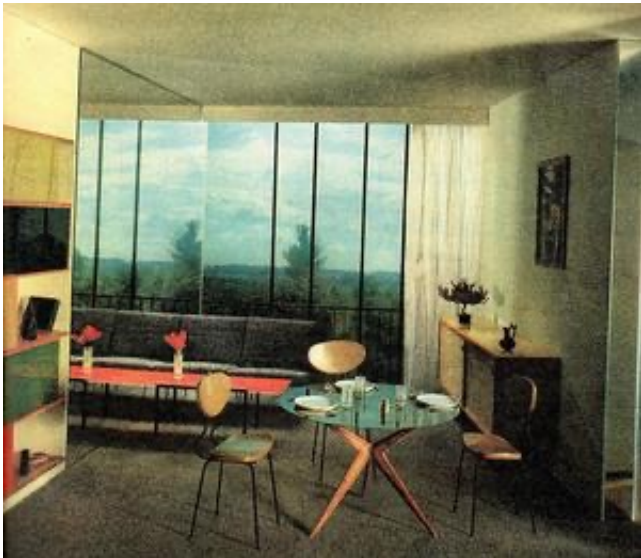

Prediction: yes

Label: no

|                                                                                       |                                                                                     |
|---------------------------------------------------------------------------------------|-------------------------------------------------------------------------------------|
| 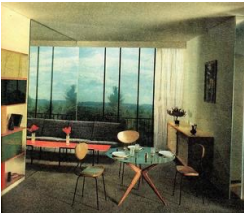    | <code>IMAGE</code>                                                                  |
| 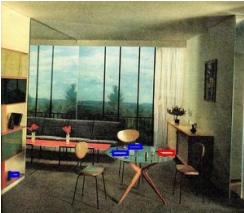   | <code>BOX0=Loc(image=IMAGE, object='plate')</code>                                  |
| 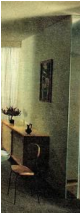   | <code>IMAGE0=CropRight(image=IMAGE, bbox=BOX0)</code>                               |
| 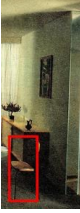   | <code>BOX1=Loc(image=IMAGE0, object='chair')</code>                                 |
| 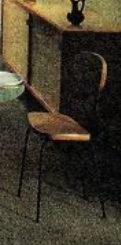 | <code>IMAGE1=Crop(image=IMAGE0, bbox=BOX1)</code>                                   |
| <code>yes</code>                                                                      | <code>ANSWER0=Vqa(image=IMAGE1, question='Is the chair made out of wicker?')</code> |

# Module Failure

Tag the three male lead characters from Friends series.

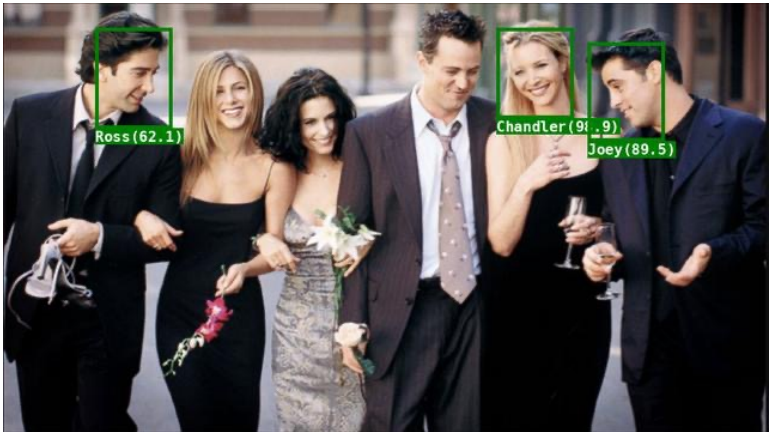

Prediction: yes

Label: no

|                                                                                                                                                                                                                                          |                                                                                                              |
|------------------------------------------------------------------------------------------------------------------------------------------------------------------------------------------------------------------------------------------|--------------------------------------------------------------------------------------------------------------|
|                                                                                                                                                                                                                                          | <code>IMAGE</code>                                                                                           |
|                                                                                                                                                                                                                                          | <code>OBJ0=FaceDet(image=IMAGE)</code>                                                                       |
| <code>[ 'Chandler', 'Joey', 'Ross' ]</code>                                                                                                                                                                                              | <code>LIST0=List(<br/>  query='male lead characters from Friends series',<br/>  max=3)</code>                |
| <code>[{'box': [101, 27, 185, 137],<br/>  'tag': 'Ross', 'score': 62.1},<br/> {'box': [541, 27, 625, 126],<br/>  'tag': 'Chandler', 'score':<br/>  98.9}, {'box': [641, 43, 725,<br/>  151], 'tag': 'Joey', 'score':<br/>  89.5}]</code> | <code>OBJ1=Classify(image=IMAGE, categories=LIST0)</code><br><br># Incorrectly classified Phoebe as Chandler |
|                                                                                                                                                                                                                                          | <code>IMAGE0=Tag(image=IMAGE, objects=OBJ1)</code>                                                           |

# Module Failure

Replace the ocean by a sandy desert

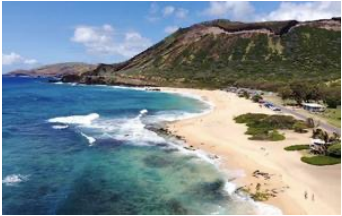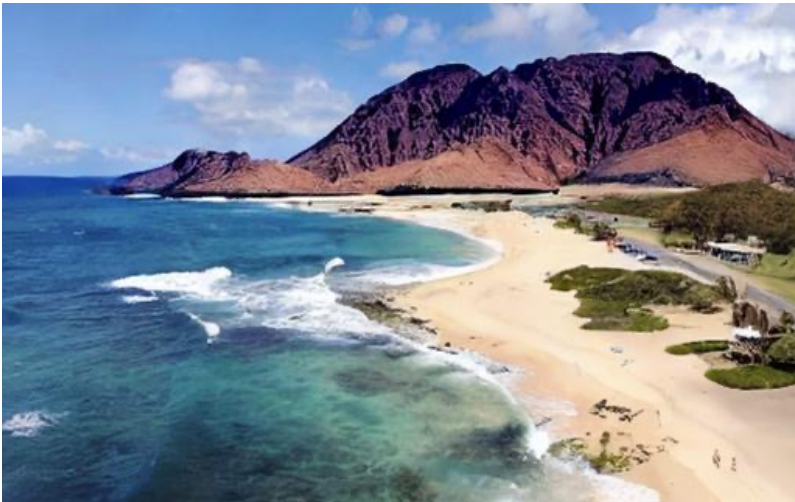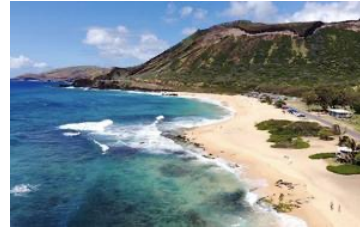

IMAGE

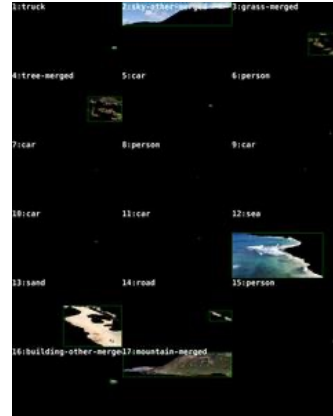

OBJ0=Seg(image=IMAGE)

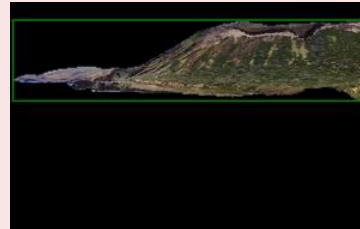

```
OBJ1=Select(  
    image=IMAGE, object=OBJ0,  
    query=['ocean'],  
    category=None)
```

# selected mountain instead of ocean

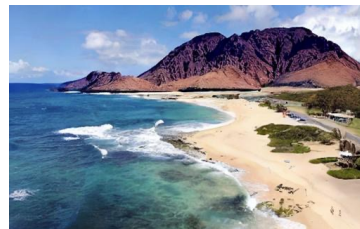

```
IMAGE0=Replace(  
    image=IMAGE,  
    object=OBJ1,  
    prompt='sandy desert')
```

Thank You!
